# Supplementary material for: Partitioning of hydrogels in 3D-printed microchannels
Source: Royal Society of Chemistry journal article supplement (doi:10.1039/c9lc00535h), 2019-01-01
Supplement: c9lc00535h1.pdf [file c9lc00535h1.pdf]

## Supplementary material

# Partitioning of hydrogels in 3D-printed microchannels

*Yong Tae Kim,<sup>1,2,\*</sup> Sara Bohjanen,<sup>1</sup> Nirveek Bhattacharjee,<sup>1</sup> and Albert Folch<sup>1,\*</sup>*

<sup>1</sup>Department of Bioengineering, University of Washington, 3720 15<sup>th</sup> Ave NE, Foegel Building  
N423A, Seattle WA 98195, USA

<sup>2</sup>Department of Chemical Engineering & Biotechnology, Korea Polytechnic University, 237  
Sangidaehak-ro, Siheung-si, Gyeonggi-do 15073, Republic of Korea

\*Corresponding author: (email) [ytkim@kpu.ac.kr](mailto:ytkim@kpu.ac.kr)

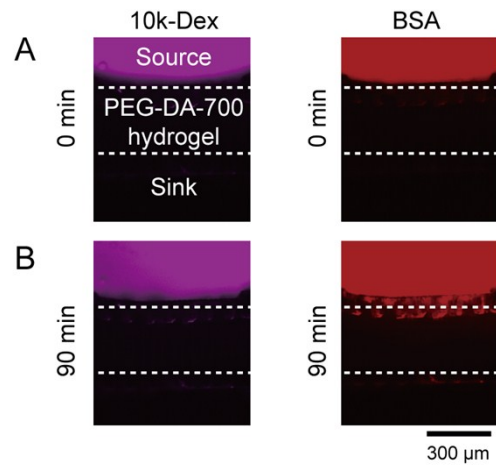

**Figure S1.** 10k-dextran-Alexa 680, and BSA-Texas Red diffusion test using the 3D-printed chip with a 10% PEG-DA-700 hydrogel barrier. (A-B) Fluorescent images of 10k-dextran-Alexa 680 (colored in purple), and BSA-Texas Red (colored in red) diffusing at 0 min and 90 min through a 10% PEG-DA-700 hydrogel barrier of the 3D-printed chip.
